# Supplementary material
Source: HighWire-hosted journal article supplement (https://bmjopenquality.bmj.com/content/11/4/e002003)
Supplement: inline-supplementary-material-2 [file inline-supplementary-material-2.pdf]

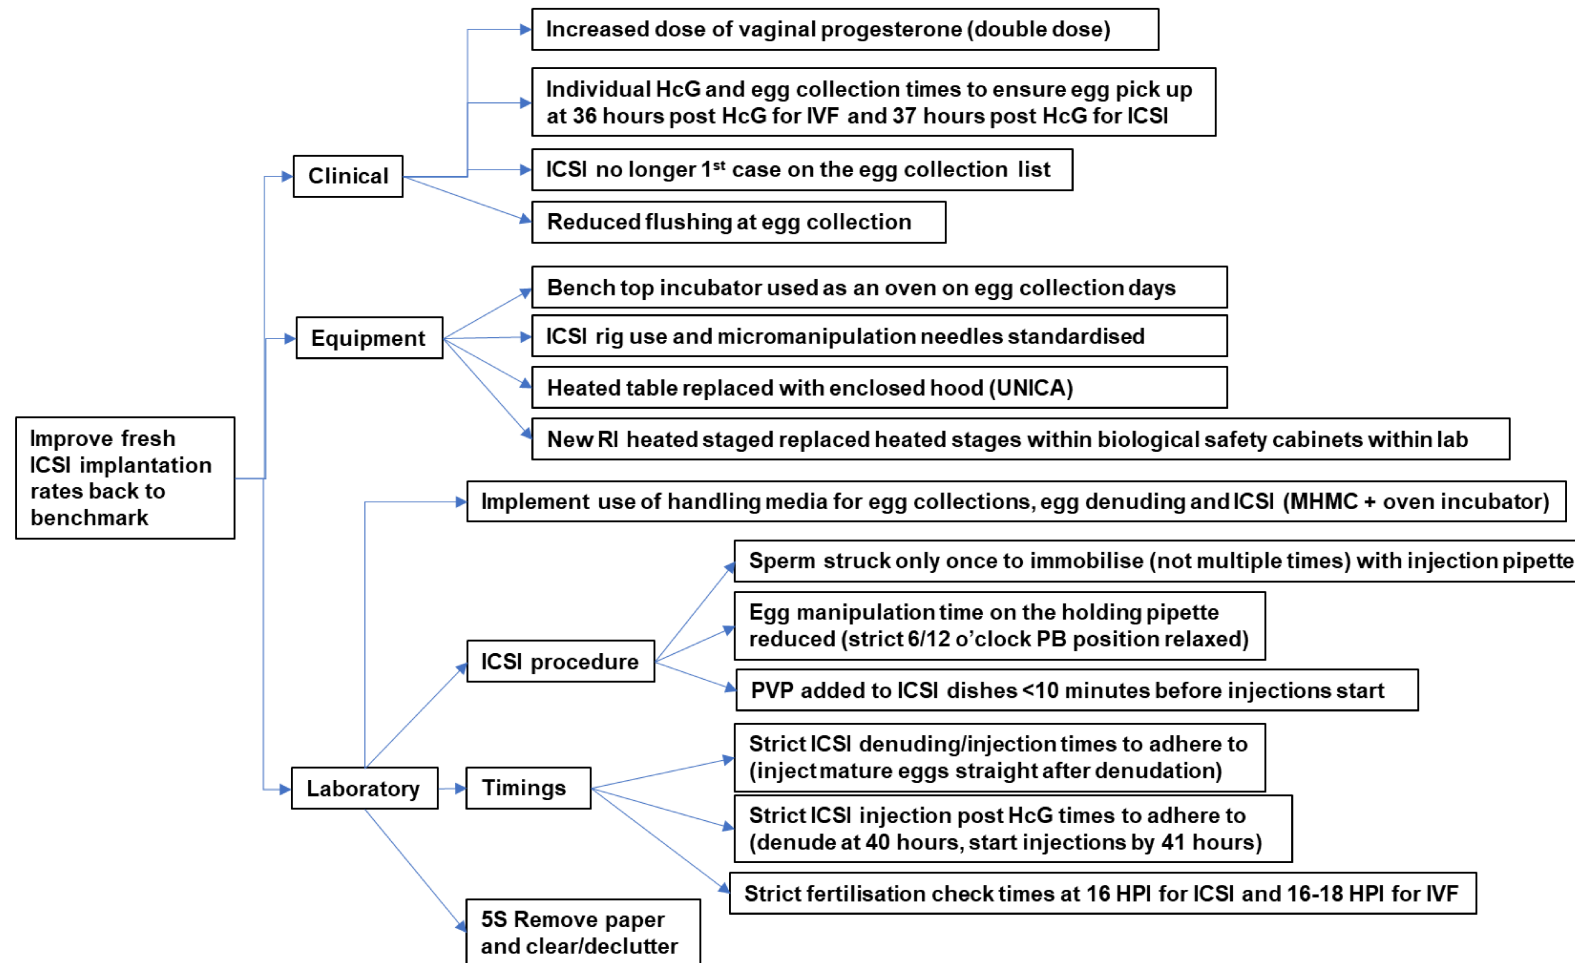

**Online supplemental information 2. Driver diagram. The changes determined by the team for improvement of fresh ICSI success rates following a root cause analysis, troubleshooting, data analysis and recommendations from an external review are listed above. The changes for improvement cover three areas; clinical, laboratory and equipment.**
